# Supplementary material for: Internal audits as a tool to assess the compliance with biosecurity rules in a veterinary faculty
Source: Front Vet Sci. 2023 Mar 2;10:960051. doi: 10.3389/fvets.2023.960051 (PMC10018162; doi:10.3389/fvets.2023.960051)
Supplement: Supplementary file 1 [file Data_Sheet_1.xlsx]

## Sheet: Persons
PERSONS
Dress and equipment			N
Students		Score	1	2	3	4	5	6	7	8	9	10
Cleanliness and wearing of basic PPE	Clean and buttoned up	0
	Clean but not buttoned up	1
	Dirty and buttoned up	2
	Dirty and not buttoned up	3
Cleanliness of footwear	Clean rubber boots/safety shoes	0
	Clean fancy boots or non-safety shoes	1
	Dirty rubber boots/safety shoes	2
	Dirty fancy boots	3
Student identification	Personalised badge	0
	Nominative overalls	1
	No identification	3
Wearing a long sleeve disposable apron	Animal-dedicated apron	0
	Same apron used for several patients	1
	No use of an apron	3
Wearing disposable gloves	One pair of disposable gloves per patient	0
	Wearing the same gloves for ≥ 1 patient	1
	No use of disposable gloves	3
Staff (clinicians - interns - technicians)		Score	1	2	3	4	5	6	7	8	9	10
Cleanliness of basic PPE	Clean nominative smock	0
	Clean non-nominative smock	1
	Dirty nominative smock	2
	Dirty non-nominative smock	3
Cleanliness of footwear	Yes	0
	No	3
Wearing a long sleeve disposable apron	Animal-dedicated apron	0
	Same apron used for several patients	1
	No use of an apron	3
Wearing disposable gloves	One pair of disposable gloves per patient	0
	Wearing the same gloves for ≥ 1 patient	1
	No use of disposable gloves	3
Stable staff		Score	1	2	3	4	5	6	7	8	9	10
Type and cleanliness of working clothes	Clean and buttoned up	0
	Clean but not buttoned up	1
	Dirty and buttoned up	2
	Dirty and not buttoned up	3
Type and cleanliness of footwear	Clean safety shoes	0
	Clean shoes other than safety shoes	1
	Dirty safety shoes	2
	Dirty shoes other than safety shoes	3
Wearing a long sleeve disposable apron	Animal-dedicated apron	0
	Same apron used for several patients	1
	No use of an apron	3
Wearing disposable gloves	one pair of disposable gloves per patient	0
	wearing the same gloves for ≥ 1 patient	1
	No use of disposable gloves	3
Preparation procedure for people			N
Students		Score	1	2	3	4	5	6	7	8	9	10
Place of preparation	Amphi A lockers	0
	Outside the clinic	1
	Coming fully suited (home or vehicle)	3
Storage of personal belongings	Amphi A lockers	0
	Outside the clinic	1
	Coming fully suited (home or vehicle)	3
Long hair tied up (or short hair)	Yes	0
	No	3
No wearing of jewelry (except watch)	Yes	0
	No (rings, etc.)	3
Wearing accessories (e.g. scarf)	No	0
	Yes (e.g. scarf, etc.)	3
Staff (clinicians - interns - technicians)		Score	1	2	3	4	5	6	7	8	9	10
Long hair tied up (or short hair)	Yes	0
	No	3
No wearing of jewelry (except watch)	Yes	0
	No (rings, etc.)	3
Wearing accessories (e.g. scarf)	No	0
	Yes (e.g. scarf, etc.)	3
Stable staff		Score	1	2	3	4	5	6	7	8	9	10
Long hair tied up (or short hair)	Yes	0
	No	3
No wearing of jewelry (except watch)	Yes	0
	No	3
Wearing accessories (e.g. scarf)	No	0
	Yes	3
Entry of persons			N
Students		Score	1	2	3	4	5	6	7	8	9	10
Walking through the footbath/foot mat upon entering the building	Systematically	0
	Occasionnally	1
	Never	2
	No footbath/foot mat	3
Hand hygiene upon entering class 3	Systematic washing then disinfection	0
	Disinfection only	1
	Washing only (no disinfection)	2
	No washing nor disinfection	3
Wearing a long sleeve disposable apron	Animal-dedicated apron	0
	One apron for several patients	1
	No apron worn	3
Wearing disposable gloves	one pair of disposable gloves per patient	0
	wearing the same gloves for ≥ 1 patient	1
	No use of disposable gloves	3
Staff (clinicians - interns - technicians)		Score	1	2	3	4	5	6	7	8	9	10
Walking through the footbath/foot mat upon entering the building	Systematically	0
	Occasionnally	1
	Never	2
	No footbath/foot mat	3
Hand hygiene upon entering class 3	Systematic washing then disinfection	0
	Disinfection only	1
	Washing only (no disinfection)	2
	No washing nor disinfection	3
Wearing a long sleeve disposable apron	Animal-dedicated apron	0
	One apron for several patients	1
	No apron worn	3
Wearing disposable gloves	one pair of disposable gloves per patient	0
	wearing the same gloves for ≥ 1 patient	1
	No use of disposable gloves	3
Between 2 patients			N
Students		Score	1	2	3	4	5	6	7	8	9	10
Frequency of glove changing between patients	After each patient	0
	Same gloves used for several patients	1
	No use of disposable gloves	3
Type of use of long sleeve disposable apron	Animal-dedicated apron	0
	One apron for several patients	1
	No use of an apron	3
Method of hand hygiene	Systematic washing then disinfection	0
	Disinfection only	1
	Washing only (no disinfection)	2
	No washing nor disinfection	3
Frequency of hand hygiene	Systematically after each patient	0
	After several patients	1
	If hands visually dirty	2
	Never wahsing or disinfecting hands	3
Staff (clinicians - interns - technicians)		Score	1	2	3	4	5	6	7	8	9	10
Frequency of glove changing between patients	After each patient	0
	Same gloves used for several patients	1
	No use of disposable gloves	3
Type of use of long sleeve disposable apron	Animal-dedicated apron	0
	One apron for several patients	1
	No use of an apron	3
Method of hand hygiene	Systematic washing then disinfection	0
	Disinfection only	1
	Washing only (no disinfection)	2
	No washing nor disinfection	3
Frequency of hand hygiene	Systematically after each patient	0
	After several patients	1
	If hands visually dirty	2
	Never wahsing or disinfecting hands	3
Exit of persons			N
Students		Score	1	2	3	4	5	6	7	8	9	10
Method of hand hygiene	Systematic washing then disinfection	0
	Disinfection only	1
	Washing only (no disinfection)	2
	No washing nor disinfection	3
Disposal of gloves in yellow containers	Systematically	0
	No yellow container available
	No use of disposable gloves	3
Fate of the long sleeve disposable apron	Hanged back in front of the patient's box or disposed of in B2 containers	0
	No yellow container available	2
	No use of an apron	3
Method of hand hygiene upon exiting the unit	Systematically upon exiting the unit	0
	Disinfection only	1
	Washing only (no disinfection)	2
	No washing nor disinfection	3
Staff (clinicians - interns/residents - technicians)		Score	1	2	3	4	5	6	7	8	9	10
Method of hand hygiene	Systematic washing then disinfection	0
	Disinfection only	1
	Washing only (no disinfection)	2
	No washing nor disinfection	3
Disposal of gloves in yellow containers	Systematically	0
	No yellow container available	2
	No use of disposable gloves	3
Fate of the long sleeve disposable apron	Hanged back in front of the patient's box or disposed of in B2 containers	0
	No yellow container available	2
	No use of an apron	3
Method of hand hygiene upon exiting the unit	Systematically upon exiting the unit	0
	Disinfection only	1
	Washing only (no disinfection)	2
	No washing nor disinfection	3

## Sheet: Behavior
BEHAVIOR
General			N
Students		Score	1	2	3	4	5	6	7	8	9	10
Respect of floor color lines	Full respect	0
	Twice out of three	1
	Once out of two	2
	No respect at all	3
Food and beverage consumption	Cafeteria	0
	Clinic (not if animals)	2
	Everywhere (including hospitalization)	3
Presence of dogs on site	No dogs	0
	Dogs on leash in the yard	1
	Dogs roaming free in the yard	2
	Dogs roaming free in the hospitalisation stables	3
No smoking	Compliance with the prohibition	0
	Smoking in the yard	1
	Smoking indoors (in the clinic)	3
Staff (clinicians - interns/residents - technicians)		Score	1	2	3	4	5	6	7	8	9	10
Respect of floor color lines	Full respect	0
	Twice out of three	1
	Once out of two	2
	No respect at all	3
Food and beverage consumption	Cafeteria	0
	Office	1
	Clinic (not if animals)	2
	Everywhere (including hospitalization)	3
Presence of dogs on site	No dogs	0
	Dogs on leash in the yard	1
	Dogs roaming free in the yard	2
	Dogs roaming free in the hospitalisation stables	3
No smoking	Compliance with the prohibition	0
	Smoking in the yard	1
	Smoking indoors (in the clinic)	3
Stable staff		Score	1	2	3	4	5	6	7	8	9	10
Respect of floor color lines	Full respect	0
	Twice out of three	1
	Once out of two	2
	No respect at all	3
Food and beverage consumption	Cafeteria	0
	Office	1
	Clinic (not if animals)	2
	Everywhere (including hospitalization)	3
Presence of dogs on site	No dogs	0
	Dogs on leash in the yard	1
	Dogs roaming free in the yard	2
	Dogs roaming free in the hospitalisation stables	3
No smoking	Compliance with the prohibition	0
	Smoking in the yard	1
	Smoking indoors (in the clinic)	3
Hand hygiene (washing and disinfection)		Score	1	2	3	4	5
Presence of poster(s) on hand hygiene	At each handwashing place	0
	Some posters in the clinic	1
	Only one poster in the clinic	2
	No poster	3
Students		Score	1	2	3	4	5	6	7	8	9	10
Hand washing method	Compliance with standard procedure	0
	Soaping too short - disinfection only	1
	Hand washing with clear water only	2
	No hand washing	3
Hand washing after wound care or bandage change	Systematic	0
	Frequent	1
	Occasional	2
	Never	3
Hand washing after catheter placement	Systematic	0
	Frequent	1
	Occasional	2
	Never	3
Hand washing after eye care	Systematic	0
	Frequent	1
	Occasional	2
	Never	3
Hand washing after each patient	Systematic	0
	Frequent	1
	Occasional	2
	Never	3
Hand washing upon exiting the clinic	Systematic	0
	Frequent	1
	Occasional	2
	Never	3
Staff (clinicians - interns/residents - technicians)		Score	1	2	3	4	5	6	7	8	9	10
Hand washing method	Compliance with standard procedure	0
	Soaping too short - disinfection only	1
	Hand washing with clear water only	2
	No hand washing	3
Hand washing after wound care or bandage change	Systematic	0
	Frequent	1
	Occasional	2
	Never	3
Hand washing after catheter placement	Systematic	0
	Frequent	1
	Occasional	2
	Never	3
Hand washing after eye care	Systematic	0
	Frequent	1
	Occasional	2
	Never	3
Hand washing after each patient	Systematic	0
	Frequent	1
	Occasional	2
	Never	3
Hand washing upon exiting the clinic	Systematic	0
	Frequent	1
	Occasional	2
	Never	3
Stable staff		Score	1	2	3	4	5	6	7	8	9	10
Hand washing method	Compliance with standard procedure	0
	Soaping too short - disinfection only	1
	Hand washing with clear water only	2
	No hand washing	3
Hand washing upon exiting the clinic	Systematic	0
	Frequent	1
	Occasional	2
	Never	3
Hand washing after cleaning/disinfection of boxes	Systematic	0
	Frequent	1
	Occasional	2
	Never	3

## Sheet: Animals
BEHAVIOUR
Animals			N
		Score	1	2	3	4	5	6	7	8	9	10
Identification on the stall door (class of risk and infectious diagnosis)	Class or risk + infectious diagnosis	0
	Class of risk	1
	Infectious diagnosis	2
	No identification	3
Identification of risk class (Class 3) on the patient	Orange halter + orange tag on the file	0
	Orange halter	1
	Orange tag on the file	2
	No identification	3
Storage of medicine (treatment cream, ophthalmic ointments)	Box fixed on the box door (specific medication)	0
	Medicine in front of the box	1
	Medicine non-animal specific	3
Cleanliness of animals	Animals are globally clean	0
	Animals are globally dirty	3
Consultations			N
		Score	1	2	3	4	5
Timing of patient's unloading	After registration and approval by the clinician	0
	After the Clinician's approval	1
	After registration, without waiting for the clinicians's approval	2
	Unloading without registration	3
Contacts with hospitalized horses	None	0
	Minimal	1
	No particular attention	3
Feeding		Score
Type of storage of grains and supplements	Closed containers	0
	Original packages (bags)	1
	Open wagons	3
Fodder availability in the unit	Minimal amounts - restricted access	0
	Minimal amounts - open access	3
Storage of straw, fodder and cereals	Barn - doors closed	0
	Barn - open doors	3
Importance of pest control (rodents)	Control of rodents in the hospital and in the barn	0
	Control of rodents in the barn only	1
	Control of rodents in the hospital only	2
	No control of rodents	3
Movements of animals			N
		Score	1	2	3	4	5
Frequency of animal exits	No exit	0
	Complementary examinations only	1
	Occasional	2
	Frequent	3
Picking horse's feet before getting out of the box	Systematic	0
	Frequent	1
	Occasional	2
	Never	3
Scrubbing horse's feet with 0.5% chlorhexidine 0,5% before getting out of the box	Systematic	0
	Frequent	1
	Occasional	2
	Never	3
Overshoes on horse's feet for Imaging Unit	Systematic	0
	Frequent	1
	Occasional	2
	Never	3
Cleansing of the horse's path if necessary	Systematic	0
	Frequent	1
	Occasional (if diarrhoea)	2
	Never	3
Disinfection of the horse's path if necessary	Systematic	0
	Frequent	1
	Occasional (if diarrhoea)	2
	Never	3

## Sheet: Premises
PREMISES
Premises			N
General		Score	1	2	3	4	5	6	7	8	9	10
Type of identification (ID) on the doors of the box, unit and building	ID class of risk + diagnosis	0
	ID class of risk	1
	Infectious diagnosis	2
	No ID class, no risk, no infectious diagnosis	3
Visibility of color lines	Very good visibility	0
	Medium visibility	1
	Bad visibility	2
	Non visible	3
Cleaning order implemented (if same stable staff for classes 1-2 and class 3)	Class 1-2 then class 3	0
	No cleaning order	3
Frequency of door knobs disinfection	Daily	0
	Once a month	1
	Less often than once a month	2
	Never	3
For hand hygiene		Score	1	2	3	4	5	6	7	8	9	10
Availability of antibacterial soap	Dispenser full	0
	Dispenser empty	2
	Not available	3
Availability of paper for hand drying	Dispenser full	0
	Dispenser empty	2
	Not available	3
Availability of disinfectant	Dispenser full	0
	Dispenser empty	2
	Not available	3
Presence of containers for disposal of hand drying paper	Present	0
	Absent	3
For footwear cleansing		Score
Presence of a boot-washer	In each unit	0
	One in the building	1
	Not boot-washer	3
Foot baths / foot mats		Score	1	2	3	4	5
Presence of a foot bath/foot mat	At the entrance to each unit	0
	At the entrance to the building	2
	No foot bath/foot mat	3
Aspect of foot baths/foot mats	Macroscopically clean footbath/foot mat	0
	Macroscopically dirty footbath/foot mat	2
	No footbath/foot mat	3
Frequency of foot bath emptying/foot mat wetting	Daily	0
	If visually dirty	1
	Three times a week	2
	Less often than three times a week	3
Standard disinfectant(s) used for foot baths/foot mats	Registered for use in Belgium	0	Standard disinfectant(s) used for foot baths/foot mats					……………………………………
	Not registered for use in Belgium	2
	No disinfection	3
Frequency of door closing		Score	1	2	3	4	5
Frequency of unit door closing	Sytematically	0
	Occasionnally	1
	Rarely	2
	Impossibility to close the door correctly	3
Frequency of building door closed	Sytematically	0
	Occasionnaly	1
	Rarely	2
	Impossibility to close the door correctly	3
Cleaning equipment for Class 3 boxes (wheelbarrow and tools)		Score
Cleaning equipment (wheelbarrow + tools: forks, brushes, etc. )	Class 3-dedicated	0
	Common with classes 1-2 but cleansing and disinfection after use in class 3	1
	Common with classes 1-2 but no cleansing and disinfection after use in class 3	3
Cleansing and disinfection
Boxes		Score
Frequency of faeces and dirty litter removal	Daily	0
	Twice a week	1
	Once a week	2
Complete emptying of the box after the animal discharge	Yes	0
	No	3
Notification of the box to be cleaned and disinfected	Sign "to be disinfected" on the box door	0
	Oral instruction	1
	No instruction	3
Cleansing method after patient discharge - compliance with standard method	Total compliance	0		Standard method : (a) removal of litter, (b) sweeping, (c) wetting, (d) application of detergent solution, (e) scrubbing, (f) rinsing and (g) left to dry
	Partial compliance (no sweeping, no rinsing)	1
	Poor compliance (no sweeping, no wetting, no scrubbing, no rinsing, not left to dry)	2
	No compliance or no cleaning	3
Disinfection method after patient discharge - compliance with standard method	Total compliance	0		Standard method : (a) appropriate cleaning (see above), (b) application of disinfecting solution, (c) leaving the disinfectant to act, (d) rinsing, (e) left to dry
	Partial compliance (no rinsing)	1
	Poor compliance (no cleaning before, no respect of contact time)	2
	No compliance or no disinfection	3
Standard disinfectant(s) used for the boxes (usually 2% bleach)	2% bleach - registered for use in Belgium	0		Standard disinfectant(s) used for boxes			……………………………………
	Adapted but other than 2% bleach - registered for use in Belgium	1
	Other than 2% bleach - not registered for use in Belgium	2
	No disinfection	3
Disinfectant(s) used after housing a Rhodococcus equi-foal	RBS Foglyam MD	0		Standard disinfectant(s) used after R. equi foal			……………………………………
	Adapted but other than RBS Foglyam MD - registered for use in Belgium	1
	Other than RBS Foglyam MD - not registered for use in Belgium	2
	No disinfection	3
Disinfectant used in case of parasitic disease	Sarnacuran before bleach	0
	No use of Sarnacuran	3
Disinfectant(s) used after a rotavirus diarrhoea	Umonium Master before bleach	0		Standard disinfectant(s) used after rotavirus diarrhoea			……………………………………
	Not Umonium but adapted - registered for use in Belgium	1
	Not Umonium - not registered for use in Belgium	2
	No disinfection	3
Disinfectant contact time	According to the manufacturer's instructions	0
	systematically 15 minutes	1
	Less than 15 minutes	3
Type of PPE worn to perform the cleansing and disinfection process	Overalls + gloves + respiratory mask + safety goggles	0
	Overalls + gloves + respiratory mask	1
	Overalls + gloves	2
	No PPE worn	3
Equipment to clean the boxes - wheelbarrow		Score
Frequency of wheelbarrow cleansing	Daily	0
	If visually dirty	1
	Once a week	2
	Less often than once a week	3
Wheelbarrow cleaning method - compliance with standard method	Total compliance	0		Standard method : (a) removal of litter, (b) wetting, (c) application of detergent solution, (d) scrubbing, (e) rinsing and (f) left to dry
	Partial compliance (no sweeping, no rinsing)	1
	Poor compliance (no sweeping, no wetting, no scrubbing, no rinsing, not left to dry)	2
	No cleaning	3
Frequency of wheelbarrow disinfection	Daily	0
	If visually dirty	1
	Once a week	2
	Less often than once a week	3
Disinfection method for wheelbarrows - compliance with standard method	Total compliance	0		Standard method : (a) appropriate cleaning (see above), (b) application of disinfecting solution, (c) leaving the disinfectant to act, (d) rinsing, (e) left to dry
	Partial compliance (no rinsing)	1
	Poor compliance (no cleaning before, no respect of contact time)	2
	No compliance or no disinfection	3
Standard disinfectant(s) used for wheelbarrow	Registered for use in Belgium	0		Standard disinfectant(s) used for wheelbarrow					……………………………………
	Not registered for use in Belgium	2
	No disinfection	3
Disinfectant contact time	According to the manufacturer's instructions	0
	systematically 15 minutes	1
	Less than 15 minutes	3
Type of PPE worn to clean and disinfect wheelbarrows	Overalls + gloves + respiratory mask + safety goggles	0
	Overalls + gloves + respiratory mask	1
	Overalls + gloves	2
	No PPE worn	3
Equipment to clean the boxes - tools (forks, brushes, etc.)		Score
Frequency of cleansing the tools used to clean the boxes	Daily	0
	Twice a week	1
	Once a week	2
	Less often than once a week	3
Cleaning method of equipment used to clean the boxes - compliance with standard method	Total compliance	0		Standard method : (a) wetting, (d) application of detergent solution, (e) scrubbing, (f) rinsing and (g) left to dry
	Partial compliance (no rinsing)	1
	Poor compliance (no wetting, no scrubbing, no rinsing, not left to dry)	2
	No cleaning	3
Frequency of disinfection for the equipment used to clean the boxes	Once a week	0
	Twice a month	1
	Once a month	2
	Less often than once a month	3
Disinfection method for cleaning tools - compliance with standard method	Total compliance	0		Standard method : (a) appropriate cleaning (see above), (b) dipping in a disinfecting solution, (c) respect contact time, (d) rinsing, (e) left to dry
	Partial compliance (no rinsing)	1
	Poor compliance (no cleaning before, no respect of contact time)	2
	No compliance or no disinfection	3
Standard disinfectant(s) used for tools	Registered for use in Belgium	0		Standard disinfectant(s) used for wheelbarrow					……………………………………
	Not registered for use in Belgium	2
	No disinfection	3
Disinfectant contact time	According to the manufacturer's instructions	0
	systematically 15 minutes	1
	Less than 15 minutes	3
Type of PPE worn to clean and disinfect the tools used to clean the boxes	Overalls + gloves + respiratory mask + safety goggles	0
	Overalls + gloves + respiratory mask	1
	Overalls + gloves	2
	No PPE worn	3
Floor of consultation rooms		Score
Frequency of consultation room floor cleaning	Daily	0
	Twice a week	1
	Once a week	2
	Once a month	3
Cleansing method for the floors of consultation rooms - compliance with standard method	Total compliance	0		Standard method : (a) sweeping, (b) wetting, (c) application of detergent solution, (d) scrubbing, (e) rinsing and (f) left to dry
	Partial compliance (no sweeping, no rinsing)	1
	Poor compliance (no sweeping, no wetting, no scrubbing, no rinsing, not left to dry)	2
	No compliance or no cleaning	3
Frequency of consultation room floor disinfection	Daily	0
	Twice a week	1
	Once a week	2
	Once a month	3
Disinfection method for the floor of consultation rooms - compliance with standard method	Total compliance	0		Standard method : (a) appropriate cleaning (see above), (b) application of disinfecting solution, (c) leaving the disinfectant to act, (d) rinsing, (e) left to dry
	Partial compliance (no rinsing)	1
	Poor compliance (no cleaning before, no respect of contact time)	2
	No compliance or no disinfection	3
Standard disinfectant(s) used for the floor of consultation rooms	Registered for use in Belgium	0		Standard disinfectant(s) used for wheelbarrow					……………………………………
	Not registered for use in Belgium	2
	No disinfection	3
Disinfectant contact time	According to the manufacturer's instructions	0
	systematically 15 minutes	1
	Less than 15 minutes	3
Type of PPE worn to clean and disinfect the floor of consultation rooms	Overalls + gloves + respiratory mask + safety goggles	0
	Overalls + gloves + respiratory mask	1
	Overalls + gloves	2
	No PPE worn	3
(Indoor) corridors		Score
Corridor cleaning frequency	Daily	0
	Twice a week	1
	Once a week	2
	Once a month	3
Cleansing method for corridors - compliance with standard method	Total compliance	0		Standard method : (a) sweeping, (b) wetting, (c) application of detergent solution, (d) scrubbing, (e) rinsing and (f) left to dry
	Partial compliance (no sweeping, no rinsing)	1
	Poor compliance (e.g. no sweeping, no wetting, no scrubbing, no rinsing, not left to dry)	2
	No compliance or no cleaning	3
Corridor disinfection frequency	Daily	0
	Twice a week	1
	Once a week	2
	Once a month	3
Disinfection method for corridors - compliance with standard method	Total compliance	0		Standard method : (a) appropriate cleaning (see above), (b) application of disinfecting solution, (c) leaving the disinfectant to act, (d) rinsing, (e) left to dry
	Partial compliance (no rinsing)	1
	Poor compliance (no cleaning before, no respect of contact time)	2
	No compliance or no disinfection	3
Standard disinfectant(s) used for corridors	Registered for use in Belgium	0		Standard disinfectant(s) used for wheelbarrow					……………………………………
	Not registered for use in Belgium	2
	No disinfection	3
Disinfectant contact time	According to the manufacturer's instructions	0
	systematically 15 minutes	1
	Less than 15 minutes	3
Type of PPE worn to clean and disinfect the corridors	Overalls + gloves + respiratory mask + safety goggles	0
	Overalls + gloves + respiratory mask	1
	Overalls + gloves	2
	No PPE worn	3
Covered walkaway		Score
Covered walkaway cleaning frequency	Daily	0
	Twice a week	1
	Once a week	2
	Once a month	3
Covered walkaway cleaning method - compliance with SOPs	Total compliance	0		Standard method : (a) sweeping, (b) wetting, (c) application of detergent solution, (d) scrubbing, (e) rinsing and (f) left to dry
	Partial compliance (no sweeping, no rinsing)	1
	Poor compliance (no sweeping, no wetting, no scrubbing, no rinsing, not left to dry)	2
	No compliance or no cleaning	3
Covered walkaway disinfection frequency	Once a week	0
	Twice a month	1
	Once a month	2
	Less often than once a month	3
Covered walkaway disinfection method - compliance with SOPs	Total compliance	0		Standard method : (a) appropriate cleaning (see above), (b) application of disinfecting solution, (c) leaving the disinfectant to act, (d) rinsing, (e) left to dry
	Partial compliance (no rinsing)	1
	Poor compliance (no cleaning before, no respect of contact time)	2
	No compliance or no disinfection	3
Standard disinfectant(s) used for the covered walkaway	Registered for use in Belgium	0		Standard disinfectant(s) used for wheelbarrow					……………………………………
	Not registered for use in Belgium	2
	No disinfection	3
Disinfectant contact time	According to the manufacturer's instructions	0
	systematically 15 minutes	1
	Less than 15 minutes	3
Type of PPE worn to clean and disinfect the covered walkaway	Overalls + gloves + respiratory mask + safety goggles	0
	Overalls + gloves + respiratory mask	1
	Overalls + gloves	2
	No PPE worn	3
B41 courtyard		Score
B41 courtyard cleaning frequency	Daily	0
	Twice a week	1
	Once a week	2
	Once a month	3
B41 courtyard cleaning method - compliance with SOPs standard method	Total compliance	0		Standard method : (a) removal of eventual organic dirty, (b) sweeping, (c) wetting, (d) application of detergent solution, (e) scrubbing, (f) rinsing and (g) left to dry
	Partial compliance (no sweeping, no rinsing)	1
	Poor compliance (no sweeping, no wetting, no scrubbing, no rinsing, not left to dry)	2
	No compliance or no cleaning	3
Type of PPE worn to clean the B41 courtyard	Overalls + gloves + respiratory mask + safety goggles	0
	Overalls + gloves + respiratory mask	1
	Overalls + gloves	2
	No PPE worn	3
General indoor horizontal surfaces (sinks, tables, etc. other than floors)		Score
Cleaning frequency	Once a week	0
	Twice a month	1
	Once a month	2
	Less often than once a month	3
Cleansing method - compliance with standard method	Total compliance	0		Standard method : (a) removal of eventual organic dirty, (b) wetting, (d) application of detergent solution, (e) scrubbing, (f) rinsing and (g) left to dry
	Partial compliance (no sweeping, no rinsing)	1
	Poor compliance (no sweeping, no wetting, no scrubbing, no rinsing, not left to dry)	2
	No compliance or no cleaning	3
Disinfection frequency	Once a week	0
	Twice a month	1
	Once a month	2
	Less often than once a month	3
Dsinfection method - compliance with standard method	Total compliance	0		Standard method : (a) appropriate cleaning (see above), (b) application of disinfecting solution, (c) leaving the disinfectant to act, (d) rinsing, (e) left to dry
	Partial compliance (no rinsing)	1
	Poor compliance (no cleaning before, no respect of contact time)	2
	No compliance or no disinfection	3
Standard disinfectant(s) used surfaces	Registered for use in Belgium	0		Standard disinfectant(s) used for surfaces					……………………………………
	Not registered for use in Belgium	2
	No disinfection	3
Disinfectant contact time	According to the manufacturer's instructions	0
	systematically 15 minutes	1
	Less than 15 minutes	3
Type of PPE worn to clean and disinfect general surfaces	Overalls + gloves + respiratory mask + safety goggles	0
	Overalls + gloves + respiratory mask	1
	Overalls + gloves	2
	No PPE worn	3

## Sheet: Waste management
WASTE MANAGEMENT
Waste management			N
B2 containers (for biologically contaminated waste)		Score	1	2	3	4	5	6	7	8	9	10
Frequency of use of yellow containers for biologically contaminated (B2) waste	Systematic	0
	Frequent	1
	Occasional	2
	Never	3
Presence of poster(s) reminding B2 waste management	In each unit - next to each container	0
	In each building	2
	No poster	3
Presence of yellow containers for B2 waste	In each unit	0
	In each building	2
	Absent	3
Cleanliness of the exterior of B2 yellow containers	Clean	0
	Dirty (blood, etc.)	3
B2 containers for sharps		Score	1	2	3	4	5	6	7	8	9	10
Frequency of use of container for sharps (yellow box)	Systematic	0
	Frequent	1
	Occasional	2
	Never	3
Presence of poster(s) reminding management of sharps	In each unit - next to each container	0
	In each building	2
	No poster	3
Presence of a yellow box for sharps	In each unit	0
	In each building	2
	Absent	3
B1 containers (non-contaminated medical waste)		Score	1	2	3	4	5	6	7	8	9	10
Frequency of use of containers for non-contaminated medical (B1) waste	Systematic	0
	Frequent	1
	Occasional	2
	Never	3
Presence of container(s) for B1 waste	Dans chaque unité	0
	Dans chaque bâtiment	2
	Absence	3
General		Score	1	2	3	4	5	6	7	8	9	10
Correct use of waste containers	systématique	0
	fréquente	1
	occasionnelle	2
	jamais	3
Type of waste container for PPE disposal	Yellow containers for B2 waste	0
	Container for B1 waste	3
Frequency of manure collection if the horse defecates outside the box	Systematic	0
	Frequent	1
	Occasional	2
	Never	3

## Sheet: Equipment
EQUIPMENT
Management of equipment for animals
General		Score
Specificity and storage of grooming equipment and foot pick	horse-dedicated, closed box in front of the stall	0
	horse-dedicated, left in front of the stall	1
	No - multi-horse equipment	3
Grooming equipment and foot pick disinfection frequency	1x/semaine	0
	1x/mois	1
	<1x/mois	2
	jamais	3
Clinic-provided material (blanket, etc.) disinfection frequency	After each patient/after patient discharge	0
	Twice a month	1
	Once a month	2
	Less often than once a month	3
Frequency of use of the animal's proper equipment	Never	0
	Sometimes	1
	Often	2
	Always	3
Frequency of provision of blanket and halter by the Clinic	Systematic	0
	Frequent	1
	Occasional	2
	Never	3
Specificity of blancket and halter	Systematic	0
	Frequent	1
	Occasional	2
	Never	3
Disinfection method for foot pick, grooming equipment and wrinkle	Dipping in disinfecting solution	0
	Rubbing with disinfecting solution	1
	No disinfection	3
Standard disinfectant(s) used for foot pick, grooming equipment	Registered for use in Belgium	0		Standard disinfectant(s) used					……………………………………
	Not registered for use in Belgium	2
	No disinfection	3
Frequency of wrinkle disinfection	At animal discharge (but wrinkle specific )	0
	Once a month	2
	Less often than once a month	3
Standard disinfectant(s) used for wrinkles	alcohol or chlorhexidin	0		Standard disinfectant(s) used					……………………………………
	Other than alcohol or chlorhexidin	1
	No disinfection	3
Examination equipment		Score
Frequency of examination equipment cleaning	After each use	0
	At animal discharge	1
	Once a month	2
	Less often than once a month	3
Cleaning method for examination equipment - compliance with standard method	Water + soap + paper	0
	Water + paper only	1
	Paper only	2
	No cleaning	3
Frequency of examination equipment disinfection	After each use	0
	Upon animal discharge (but wrinkle specific )	1
	Once a month	2
	Less often than once a month	3
Standard disinfectant(s) used for examination equipment	Umonium	0		Standard disinfectant(s) used					……………………………………
	Other than Umonium but adapted	1
	No disinfection	3
Specificity of thermometer	Horse-specific, kept in a closed box in front of the stall (Clinic's thermometer)	0
	Common (Clinic's thermometer)	1
	Common (Students' thermometer)	3
Frequency of thermometer cleaning	After each use	0
	Upon animal discharge (but wrinkle specific )	1
	Once a month	2
	Less often than once a month	3
Frequency of thermometer disinfection	After each use	0
	Upon animal discharge (but wrinkle specific )	1
	Once a month	2
	Less often than once a month	3
Standard disinfectant(s) used for examination equipment	Alcohol (Sterilium) or Chlorhexidin	0		Standard disinfectant(s) used					……………………………………
	Other but registered in Belgium	1
	Other not registered in Belgium
	No disinfection	3
Frequency of stethoscope cleaning	After each use	0
	Upon animal discharge (but wrinkle specific )	1
	Once a month	2
	Less often than once a month	3
Frequency of stethoscope disinfection	After each use	0
	At animal discharge (but horse-specific )	1
	Once a month	2
	Less often than once a month	3
Type of disinfectant(s) used for stethoscopes	Alcohol or Chlorhexidin	0		Standard disinfectant(s) used					……………………………………
	Other but registered in Belgium	1
	Other not registered in Belgium
	No disinfection	3
Disinfection of equipment leaving the unit (cans, etc.)	Systematic	0
	Frequent	1
	Occasional	2
	Never	3
Disinfectant(s) used for endoscope	quaternary ammonium	0		Standard disinfectant(s) used					……………………………………
	Other but registered in Belgium	1
	Other not registered in Belgium
	No disinfection	3
Special treatment after a parasitic disease	Sarnacuran	0
	No special treatment	3
Special treatment after a mycotic disease	Imaverol	0
	No special treatment	3
Management of biological samples		Score
Place of storage of biological samples	Dedicated refrigerator	0
	Refrigerator + medicine but no food	1
	No specific refrigerator	3
Mode of transport of biological samples	Transport bag identified + risk	0
	Transport bag identified	1
	Transport bag	2
	No transport bag	3
Medicine (drugs)		Score
Drug storage conditions	Locked fridge - drugs	0
	Dedicated refrigerator	1
	Refrigerator + biological samples	2
	No dedicated refrigerator	3
