# Supplementary material for: Internal audits as a tool to assess the compliance with biosecurity rules in a veterinary faculty
Source: Front Vet Sci. 2023 Mar 2;10:960051. doi: 10.3389/fvets.2023.960051 (PMC10018162; doi:10.3389/fvets.2023.960051)
Supplement: Supplementary file 2 [file Data_Sheet_2.xlsx]

## Sheet: Persons
PERSONS
Dress and equipment			N
Students		Score	1	2	3	4	5	6	7	8	9	10	11	12	13	14	15
Wearing of a single-use lab coat	Yes	0
	non	3
Wearing closed shoes	Yes	0
	non	3
No wearing of jewelry (except watch)	No jewelry	0
	Wearing jewels (rings, etc.)	3
Wearing no accessories	No accessories	0
	Wearing accessories (scarf, etc.)	3
Long hair tied up	Yes	0
	No	3
Wearing disposable gloves	Yes	0
	No	3
Scientific and technical staff		Score	1	2	3	4	5
Way of wearing the white cotton labcoat and labcoat cleanliness	Clean and buttoned up correctly	0
	Clean but not buttoned up correctly	1
	Dirty and buttoned up correctly	2
	Dirty and not buttoned up correctly	3
Wearing closed shoes	Yes	0
	non	3
No jewelry (but watch)	No jewelry	0
	Wearing jewels (rings, etc.)	3
Wearing no accessories	No accessories	0
	Wearing accessories (scarf, etc.)	3
Long hair tied up	Yes	0
	No	3
Wearing disposable gloves	Yes	0
	No	3
Preparation procedure for people			N
Students		Score	1	2	3	4	5	6	7	8	9	10	11	12	13	14	15
Storage place for personal belongings (others than pen and calculator)	Anteroom (under the coat-hangers)	0
	Brought in the lab	3
Place where the labcoat is put on	Preparation area	0
	In front of the biosafety cabinet (BSL2 area)	1
	No use of a labcoat	3
Place where disposable gloves are put on	Preparation area	0
	In front of the biosafety cabinet (BSL2 area)	1
	No use of disposable gloves	3
Scientific and technical staff		Score	1	2	3	4	5
Place where PPE is put on	Laboratory	0
	Office	1
	arrival in labcoat (home/vehicle)	3
Storage place for personal belongings	Office	0
	Laboratory	3
Place where the labcoat is put on	Entry of the lab	0
	no use of a labcoat	1
Place where disposable gloves are put on	Entry of the lab	0
	no use of disposable gloves	1
Movements of people			N
Students		Score	1	2	3	4	5	6	7	8	9	10	11	12	13	14	15
Exiting the lab with disposable gloves on	No	0
	Yes	3
Scientific and technical staff		Score	1	2	3	4	5
Exiting the lab with disposable gloves on	No	0
	Yes	3
Exit procedures for people			N
Students		Score	1	2	3	4	5	6	7	8	9	10	11	12	13	14	15
Way of glove disposal	B2 container next to the biosafety cabinet	0
	B1 waste container	2
	No use of disposable gloves	3
Place where labcoat is removed	Labcoat left on the table, next to others	0
	Labcoat disposed of in the B2 container	1
	Labcoat left on to go in the BSL1 area of the lab (theoretical)	2
	Exit of the lab with labcoat on	3
Hand hygiene method	Systematic washing then disinfection	0
	Disinfection only	1
	Hand washing only (no disinfection)	2
	No hand hygiene (no washing nor disinfection)	3
Hand hygiene place	Anteroom washing station	0
	Sink of the bench (potentially contaminated)	3
Hand hygiene upon leaving the practical works	Yes	0
	No	3
Scientific and technical staff		Score	1	2	3	4	5
Way of glove disposal	B2 container next to the biosafety cabinet	0
	B1 waste container	2
	No use of disposable gloves	3
Place where labcoat is removed	Hung back on the lab coat-rack	0
	Exit of the lab with labcoat on	3
Hand hygiene method	Systematic washing then disinfection	0
	Disinfection only	1
	Hand washing only (no disinfection)	2
	No hand hygiene (no washing nor disinfection)	3
Hand hygiene place	Anteroom washing station	0
	Sink of the bench (potentially contaminated)	3
Hand hygiene upon leaving the practical works	Yes	0
	No	3
Management of laundry of re-usable labcoat	Specialised company	0
	Other	2
	No labcoat washing	4
Compliance of labcoats laundry with recommandations (temperature and/or disinfectant, duration, dedicated machine, not mixed with other clothes)	Yes, total compliance	0							Laundry method			……………………………………
	Partial compliance (not-dedicated machine or washing with other clothes	1
	Poor compliance (temperature and/or disinfectant, duration)	2
	No compliance at all or no laundry of labcoats	3
Frequency of labcoats laundry	Once a week	0
	Once a month	1
	< once a month	2
	No labcoat laundry	3

## Sheet: Behavior
BEHAVIOR		Score
Instructions given to students before starting practical works	Yes	0
	No	3
General			N
BVM3 students		Score	1	2	3	4	5	6	7	8	9	10	11	12	13	14	15
No smoking in the lab	No	0
	Yes	3
No chewing in the lab	No	0
	Yes	3
No consumption of food and drinks	No	0
	Yes	3
No use of cell phone in the lab	No	0
	Yes	3
No pets in the lab	No	0
	Yes	3
Labcoat buttoned up correctly	Yes	0
	No	3
Hands constantly remaining in the safety cabinet during handling	Yes	0
	No	3
Hood of the biosafety cabinet kept low during handling	Yes	0
	No	3
Handling only in the presence of supervising staff	Yes	0
	No	3
Scientific and technical staff		Score	1	2	3	4	5
No smoking in the lab	No	0
	Yes	3
No chewing in the lab	No	0
	Yes	3
No use of cell phone in the lab	No	0
	Yes	3
Place of food and drinks consumption	Cafeteria	0
	Office	1
	Lab	3
Presence of a pet on site	No pet at work	0
	Pet kept in the office only	1
	Pet in the lab	3
Labcoat buttoned up correctly	oui	0
	non	3
Hands constantly remaining in the safety cabinet during handling	oui	0
	non	3
Hood of the biosafety cabinet kept low during handling	oui	0
	non	3
Hand hygiene			N
Students		Score	1	2	3	4	5	6	7	8	9	10	11	12	13	14	15
Hand hygiene method	Compliance with standard procedure	0
	Soaping too short	1
	Washing with clear water only	2
	No hand washing	3
Hand hygiene after glove removal	Systematic	0
	Frequent	1
	Occasional	2
	Never	3
Hand hygiene upon leaving the activity	Systematic	0
	Frequent	1
	Occasional	2
	Never	3
Scientific and technical staff		Score	1	2	3	4	5
Hand hygiene method	respect procédure standard	0
	Soaping too short	1
	Washing with clear water only	2
	No hand washing	3
Hand hygiene after glove removal	Systematic	0
	Frequent	1
	Occasional	2
	Never	3
Hand hygiene upon leaving the activity	Systematic	0
	Frequent	1
	Occasional	2
	Never	3
Movements			N
Students		Score	1	2	3	4	5	6	7	8	9	10	11	12	13	14	15
Dress and equipment worn to exit the lab	No PPE, after hand washing/disinfection	0
	No PPE, without hand washing/disinfection	1
	Wearing the labcoat, after hand washing/disinfection	2
	Wearing labcoat and gloves	3
Frequency of exiting the lab during the practical works session	As few as possible	0
	No particular attention	3
Respect of clean zones on the bench	Yes	0
	No	3
Scientific and technical staff		Score	1	2	3	4	5
Dress and equipment worn to exit the lab	No PPE, after hand washing/disinfection	0
	No PPE, without hand washing/disinfection	1
	Wearing the labcoat, after hand washing/disinfection	2
	Wearing labcoat and gloves	3
Frequency of exiting the lab during the practical works session	As few as possible	0
	No particular attention	3
Respect of clean zones on the bench	Yes	0
	No	3
In the event of an accident
In case of eye projection, use the lab eye-washer	Yes	0
	No	3

## Sheet: Samples
SAMPLES
Samples		Score
Method of sample identification	Species, type of sampling et reason for analysis	0
	Species and type of sampling	1
	Species	2
	Absent	3
Storage of samples in a specific freezer/refrigerator	Yes	0
	No	3
Mode of sample transportation	Sealed box, with absorbent paper	0
	Sealed box, without absorbent paper	1
	Tube holder/pot, without sealed box	2
	Carried by hand	3
Waste container used for samples	B2 container	0
	B1 container	1
	Household garbage bin	3
Scientific and technical staff		Score
Storage of samples in specific freezer/fridge after practical works	Yes	0
	No	3
In the event of an accidental spill		Score
Person(s) in charge of its management	Staff	0
	Students	3
Spill kit available in the lab	Yes	0
	No	3
Procedure in the event of an acciental spill	Gloves, absorbent paper and clean, disinfectant	0
	Gloves, absorbent paper and clean	1
	Absorbent paper and clean, then disinfect	2
	Absorbent paper and clean	3
	No cleansing nor decontamination	4
Method of hand hygiene after decontamination	Systematic washing then disinfection	0
	Disinfection only	1
	Washing only (no disinfection)	2
	No hand washing nor disinfection	3

## Sheet: Premises
PREMISES
Lab		Score
Biosafety level written on the lab door	Yes	0
	No	3
Visibility of color lines	Very good visibility	0
	Average visibility	1
	Poor visibility	2
	not visible	3
For hand hygiene (anteroom)		Score
Location of hand hygiene poster(s)	At each hand washing place	0
	Some posters in the lab	1
	Only one poster for the whole lab	2
	No poster	3
Availability of soap for handwashing	Dispenser full	0
	Dispenser empty	2
	Not available	3
Availability of paper for hand drying	Dispenser full	0
	Dispenser empty	2
	Not available	3
Availability of disinfectant	Dispenser full	0
	Dispenser empty	2
	Not available	3
Presence of a waste container for hand drying paper	Present	0
	Absent	3
Preparation procedure for premises		Score
Cleaning and disinfection of work surfaces before PWs	Yes	0
	No	3
Exit procedure for premises		Score
Cleaning and disinfection of work surfaces at the end of PWs (supervising staff)	oui	0
	non	3
Cleaning and disinfection
General - surfaces (others than bench and biosafety cabinet)		Score
Disinfection of lab surfaces	Yes	0
	No	3
Frequency of surface disinfection	After each session of PW	0
	Once a day	1
	Once a week	2
	< Once a week	3
Lab surfaces disinfection method	Spraying of disinfectant + paper	0
	Spraying of disinfectant only	2
	No disinfection	3
Standard disinfectant(s) used for surfaces	Registered for use in Belgium	0		Standard disinfectant(s) used for surfaces	……………………………………
	Not registered for use in Belgium	2			……………………………………
	No disinfection	3			……………………………………
Disinfectant contact time	According to the manufacturer's instructions	0
	Systematically 15 minutes	1
	< 15 minutes	3
Type of PPE worn during the disinfection process	Labcoat and gloves	0
	Gloves only	1
	Labcoat only	2
	No PPE worn during disinfection	3
Bench (including the sink) and biosafety cabinet		Score
Disinfection of bench and biosafety cabinet cleaning	Yes	0
	No	3
Frequency of bench and biosafety cabinet cleaning	After each session of PW	0
	Once a day	1
	Once a week	2
	< Once a week	3
Bench and biosafety cabinet disinfection method	Spraying of disinfectant + paper	0
	Spraying of disinfectant only	2
	No disinfection	3
Standard disinfectant(s) used for bench and biosafety cabinet	Registered for use in Belgium	0		Standard disinfectant(s) used for bench and biosafety cabinet	……………………………………
	Not registered for use in Belgium	2			……………………………………
	No disinfection	3			……………………………………
Disinfectant contact time	According to the manufacturer's instructions	0
	Systematically 15 minutes	1
	< 15 minutes	3
Type of PPE worn during the disinfection process	Labcoat and gloves	0
	Gloves only	1
	Labcoat only	2
	No PPE worn during disinfection	3
Anteroom handwashing station		Score
Disinfection of the anteroom handwashing station	Yes	0
	No	3
Disinfection frequency of the anteroom handwashing station	After each practical work	0
	Once a week	1
	Once a month	2
	< Once a month	3
Disinfection method of the anteroom handwashing station	Spraying of disinfectant + paper	0
	Spraying of disinfectant only	2
	No disinfection	3
Standard disinfectant(s) used the anteroom handwashing station	Registered for use in Belgium	0		Standard disinfectant(s) used for anteroom handwashing station	……………………………………
	Not registered for use in Belgium	2			……………………………………
	No disinfection	3			……………………………………

## Sheet: Waste management
WASTE MANAGEMENT
Waste management
B2 60L-containers		Score
Presence of B2 60L-containers	Several in the lab	0
	Only one for the whole lab	1
	No B2 container	3
Presence of B2 waste poster(s)	Next to each B2 container	0
	Only one for the whole lab	1
	Absent	3
Cleanliness of the external part of B2 containers	Visually clean	0
	Visually dirty (bloodstained, etc.)	3
Correct use of B2 containers	Systematic	0
	Frequent	1
	Occasional	2
	Never	3
Liquid chemical waste		Score
Disposal of liquid chemical waste	Can for special liquids	0
	Sink	3
B1 containers		Score
Presence of B1 containers	Only one in the lab	0
	No B1 containers	3
Presence of poster(s) on waste management	Next to each B1 container	0
	Only one for the whole lab	1
	Absent	3
Correct use of B1 containers	Systematic	0
	Frequent	1
	Occasional	2
	Never	3
Containers for household waste		Score
Presence of a container for household waste in the lab	Absent	0
	Present at the entrance to the lab	2
	Present in the lab	3

## Sheet: Equipment
EQUIPMENT
Lab equipment		Score
All analysis equipment is ready on each bench before the beginning of the practical work	Yes	0
	No	3
Plastic file containing documents necessary to perform PW is ready on each bench before	Yes	0
	No	3
Preparation procedure for equipment		Score
Cleaning and disinfection of equipment before the beginning of the practical work	Yes	0
	No	3
Movements of equipment			N
Students		Score	1	2	3	4	5	6	7	8	9	10	11	12	13	14	15
Material brought outside the lab	No	0
	Yes	3
