# Supplementary material for: Internal audits as a tool to assess the compliance with biosecurity rules in a veterinary faculty
Source: Front Vet Sci. 2023 Mar 2;10:960051. doi: 10.3389/fvets.2023.960051 (PMC10018162; doi:10.3389/fvets.2023.960051)
Supplement: Supplementary file 3 [file Data_Sheet_3.xlsx]

## Sheet: SI1_EQ_Cl3_Audit_Persons
PERSONS
Clothing and equipment	N
Students	1	2	3	4	5	6	7	8	9	10
Cleanliness and wearing of basic PPE	0	1	0	1	1	1	0	0	0	0
Type and cleanliness of footwear	1	1	1	1	1	1	0	0	1	0
Student identification	0	0	0	0	0	0	0	1	0	1
Wearing a long sleeve disposable apron	0	0	0	0	0	0	0	3	0	0
Wearing disposable gloves	0	0	0	0	3	0	0	0	0	0
Staff (clinicians - interns - technicians)	1	2	3	4	5	6	7	8	9	10
Cleanliness of basic PPE	0	1	2	0	3	2	0	0	0	0
Cleanliness of footwear	0	1	0	0	0	0	0	0	0	0
Wearing a long sleeve disposable apron	0
Wearing disposable gloves	0
Stable staff	1	2	3
Type and cleanliness of working clothes	0	0	0
Type and cleanliness of footwear	0	0	0
Preparation procedure for people	N
Students	1	2	3	4	5	6	7	8	9	10
Place of preparation	3	3	3	0	0	0	0	0	0	0
Storage of personal belongings	3	3	3	0	0	0	0	0	0	0
Long hair tied up	0	0	0	0	0	0	0	0	0	0
No wearing of jewelry (except watch)	0	0	0	0	0	0	0	0	0	0
Wearing no accessories	0	0	0	0	0	0	0	0	0	0
Staff (clinicians - interns - technicians)	1	2	3	4	5	6	7	8	9	10
Long hair tied up	0	0	0	0	0	0	0	0	0	0
No wearing of jewelry (except watch)	0	0	0	0	0	0	0	0	0	0
Wearing no accessories	0	0	0	0	0	0	0	0	0	0
Stable staff	1	2	3
Long hair tied up	0	0	0
No wearing of jewelry (except watch)	0	0	0
Wearing no accessories	0	0	0
Entry of persons	N
Students	1	2	3	4	5	6	7	8	9
Frequency of use of the footbath/foot mat at the entrance to the building	2	3	0	0	0	3	0	0	0
Hand hygiene upon entering class 3	3	3	3	3	1	3	3	3	1
Wearing a long sleeve disposable apron	0	0	0	3	3	3	0	0	0
Wearing disposable gloves	3	0	0	3	3	3	0	0	0
Staff (clinicians - interns - technicians)	1	2	3	4	5	6	7	8	9	10	11	12
Frequency of use of the foot bath/foot mat at the entrance to the building	0	0	1	0	0	0	0	0	0	0	0	0
Hand hygiene upon entering class 3	0	0	3	0	0	3	3	3	3	3	3	3
Wearing a long sleeve disposable apron	0	0	0	3	3	3	0	0	0	0	0	0
Wearing disposable gloves	0	0	3	0	0	0	3	0	0	0	0	0
Between 2 patients	N
Students (N)	1	2	3	4	5	6	7	8
Frequency of glove changing between patients	0	0	0	0	0	3	3	0
Type of use of long sleeve disposable apron	0	0	0	0	0	3	3	0
Method of hand hygiene	0	0	0	1	1	1	1	3
Frequency of hand hygiene	0	0	0	1	1	3	3	3
Staff (N)	1	2	3	4	5	6	7	8
Frequency of glove changing between patients	0	0	3	0	0	0	3	3
Type of use of long sleeve disposable apron	3	0	3	3	0	0	0	0
Method of hand hygiene	0	0	1	1	3	3	3	3
Frequency of hand hygiene	0	0	0	0	3	3	3	3
Exit of persons	N
Students (N)	1	2	3	4	5	6	7
Method of hand hygiene	3	3	3
Disposal of gloves in yellow containers	3	3	3	0	3	3	0
Fate of the long sleeve disposable apron	3	3	3	0	3	3	0
Method of hand hygiene upon exiting the unit	0	0	0	1	3	3	3
Staff (N)	1	2	3	4	5	6	7	8	9
Method of hand hygiene	0	0	0
Disposal of gloves in yellow containers	0	0	0	0	0	0	0	0	0
Fate of the long sleeve disposable apron	3	0	0	0	0	0	3	3	0
Method of hand hygiene upon exiting the unit	0	1	0	1	1	1	1	1	3

## Sheet: SI1_EQ_Cl3_Audit_Behavior
BEHAVIOR
General	N
Students	1	2	3	4
Respect of floor color lines	0	0	0	0
Food and beverage consumption	0	0	0	0
Presence of dogs on site	2	0	0	0
No smoking	1	1	1	1
Staff (clinicians - interns - technicians)	1	2	3
Food and beverage consumption	0	0	2
Presence of dogs on site	0	0	0
No smoking	1	0	0
Stable Staff	1	2
Food and beverage consumption	2	0
Presence of dogs on site	0	0
No smoking	0	0
Hand hygiene (washing and disinfection)	N
Hand hygiene	1	2	3	4	5
Presence of poster(s) on hand hygiene	0	0	0	0	0
Students	1	2	3
Hand hygiene method	2	1	3
Hand hygiene after wound care or bandage change	0	0	3
Hand hygiene after catheter placement	0	0	0
Hand hygiene after eye care	0	0	0
Hand hygiene after each patient	0	1	2
Hand hygiene upon exiting the clinic	3	3	3
Staff (clinicians - interns - technicians)	1	2	3
Hand hygiene method	3	0	0
Hand hygiene after wound care or bandage change	3	0	0
Hand hygiene after catheter placement	1	Sterilium disinfection only
Hand hygiene after eye care	1	Sterilium disinfection only
Hand hygiene after each patient	1	Sterilium disinfection only
Hand hygiene upon exiting the clinic	1
Stable Staff	1
Hand hygiene method	1
Hand hygiene upon exiting the clinic	0
Hand hygiene after cleaning/disinfection of boxes	2

## Sheet: SI1_EQ_Cl3_Audit_Animals
ANIMALS
Animals	1	2	3	4	5	6	7
Identification on the stall door (class of risk and infectious diagnosis)	3	1	1	1	1	1	3
Storage of medicine (treatment cream, ophthalmic ointments)	1	1	1			0	0
Cleanliness of animals	0	0	0	0	0	0	0
Identification of risk class (Class 3) on the patient	3	3	3	3	3	3	3
Consultations	Score
Timing of patient's unloading	0
Contacts with hospitalized horses	0
Feeding	Score
Type of storage of grains and supplements	0
Fodder availability in the unit	3
Storage of straw, fodder and cereals	3
Importance of pest control (rodents)	2	private company, several times a year, at specific dates but also on demand
Movements of animals	1	2	3	4	5	6	7
Frequency of animal exits	2	0	0	0	0	0	0
Picking horse's feet before getting out of the box	3
Scrubbing horse's feet with 0.5% chlorhexidine before getting out of the box	3
Overshoes on horsefeet for Imaging Unit	3
Cleansing of the horse's path if necessary	3
Disinfection of the horse's path if necessary	3

## Sheet: SI1_EQ_Cl3_Audit_Premises
PREMISES
General	1	2	3	4	5	6	7
Type of identification (ID) on the doors of the box, unit and building	1	1	3	3
Visibility of color lines	2	1			2	1	3
Cleaning order implemented (if same stable staff for classes 1-2 and class 3)	0
Frequency of door knobs disinfection	3	Never (stable staff was never given the instruction to do it)
For hand hygiene	1	2	3	4	5
Availability of antibacterial soap	2	0	0	2	0
Availability of paper for hand drying	0	2	0	0	0
Availablility of disinfectant	0	0	0	0	0
Presence of containers for disposal of hand drying paper	0	0	0	0	0
For footwear cleansing	Score
Presence of a boot-washer	3
Foot baths / foot mats	1	2	3	4	5
Presence of a foot bath/foot mat	2	0	3	0	0
Aspect of the foot bath/foot mat	2	0	0	0	0
Frequency of foot bath emptying/foot mat wetting	0	Sometimes more than once a day - foot mat: when dry
Standard disinfectant(s) used for foot baths/foot mats	0	Umonium®
Frequency of door closing	1	2	3	4	5
Frequency of unit door closing	0	0	0	1	0
Frequency of building door closed	3	The building door remains open all the time
Cleaning equipment for Class 3 boxes (wheelbarrow and tools)	Score
Cleaning equipment (wheelbarrow + tools: forks, brushes, etc. )	0
Cleansing and disinfection
Boxes	Score
Frequency of faeces and dirty litter removal	0	removal of dirty straw and faeces (fork) once a day
Complete emptying of the box after the animal discharge	0
Notification of the box to be cleaned and disinfected	0	Card or chalk inscription on the case board
Cleansing method after patient discharge - compliance with standard method	2	No detergent or detergent after disinfectant
Disinfection method after patient discharge - compliance with standard method	2	Wet + watering can with bleach + rinsing with clear water + Umonium/RBS application without rinsing (induction box : cleansing + high-pressure cleaner with RBS)
Standard disinfectant(s) used for the boxes (usually 2% bleach)	0	Bleach, Umonium®
Disinfectant(s) used after housing a Rhodococcus equi-foal	0	Umonium® or Bleach then Umonium®
Disinfectant used in case of parasitic disease	0
Disinfectant(s) used after a rotavirus diarrhoea (usually Umonium Master before bleach)	1	Bleach then Umonium®
Disinfectant contact time	1	20 minutes
Type of PPE worn to perform the cleansing and disinfection process	3	smoker only (induction box : + plastic clogs)
Equipment to clean the boxes - wheelbarrow	Score
Frequency of wheelbarrow cleansing	0
Wheelbarrow cleaning method - compliance with standard method	2	garden hose
Frequency of wheelbarrow disinfection	0
Disinfection method for wheelbarrows - compliance with standard method	1
Standard disinfectant(s) used for wheelbarrow	0	Umonium®
Disinfectant contact time	1	20 minutes
Type of PPE worn to clean and disinfect wheelbarrows	3	smoker only
Equipment to clean the tools (forks, brushes, etc.)	Score
Frequency of cleansing the tools used to clean the boxes	3	class 3-dedicated tools
Cleaning method of equipment used to clean the boxes - compliance with standard method	2	garden hose
Frequency of disinfection for the equipment used to clean the boxes	0	problem of non-compliance with classes foor tools (people use class 3 tools for class1-2 boxes)
Disinfection method for cleaning tools - compliance with standard method	2	Saoking in a waste container filled with an Umonium solution
Standard disinfectant(s) used for tools	3	Umonium®
Disinfectant contact time	1	20 minutes
Type of PPE worn to clean and disinfect the tools used to clean the boxes	3	smoker only
Floor of consultation rooms	Score
Frequency of consultation room floor cleaning	1
Cleansing method for the floors of consultation rooms - compliance with standard method	1	Vigor -
Frequency of consultation room floor disinfection	1
Disinfection method for the floor of consultation rooms - compliance with standard method	1	RBS® + rinsing + Umonium solution without rinsing
Standard disinfectant(s) used for the floor of consultation rooms	0	Umonium
Disinfectant contact time	1	20 minutes
Type of PPE worn to clean and disinfect the floor of consultation rooms	3	smoker only
(Indoor) corridors	Score
Corridor cleaning frequency	0
Cleansing method for corridors - compliance with standard method	2	Sweep - When unit empty, high-pressure cleaner
Corridor disinfection frequency	3
Disinfection method for corridors - compliance with standard method	1	Bleach then RBS/Umonium (then 2-3 days rest)
Standard disinfectant(s) used for corridors	0	Bleach, Umonium®
Disinfectant contact time	1	20 minutes
Type of PPE worn to clean and disinfect the corridors	3	smoker only
Covered walkaway	Score
Covered walkaway cleaning frequency	1
Covered walkaway cleaning method - compliance with SOPs	1	Sweep (blacksmiths); if stable staff : garden hose
Covered walkaway disinfection frequency	3
Covered walkaway disinfection method - compliance with SOPs	3	RBS® + rinsing + Umonium solution without rinsing
Standard disinfectant(s) used the for covered walkaway	3	Bleach
Disinfectant contact time	1	20 minutes
Type of PPE worn to clean and disinfect the covered walkaway	3	smoker only
B41 courtyard	Score
B41 courtyard cleaning frequency	3
B41 courtyard cleaning method - compliance with standard method	3	Fire hose
Type of PPE worn to clean the B41 courtyard	3	smoker only
General indoor horizontal surfaces (sinks, tables, etc. other than floors)	Score
Cleaning frequency	0
Cleansing method - compliance with standard method	1	detergent for sinks
Disinfection frequency	3
Dsinfection method - compliance with standard method	1	While soaking probe(s) (+ additional cleansing after)
Standard disinfectant(s) used surfaces	0	Umonium®
Disinfectant contact time	1	20 minutes
Type of PPE worn to clean and disinfect general surfaces	3	smoker only

## Sheet: SI1EQ_Cl3_Audit_Waste 
WASTE MANAGEMENT
Waste management	N
B2 containers (for biologically contaminated waste)	1	2	3	4	5	6	7	8	9
Frequency of use of yellow containers for biologically contaminated (B2) waste	0	0	0	0	0	0	0	0	0
Presence of poster(s) reminding B2 waste management	3	3	3	3	3	3	3	3	3
Presence of yellow containers for B2 waste	0	0	0	0	0	0	0	0	0
Cleanliness of the exterior of B2 yellow containers	0	0	3	3	0	0	3	0	3
B2 containers for sharps	1	2	3	4	5	6	7	8	9
Frequency of use of container for sharps (yellow box)	3	3	3	3	3	3	3	3	3
Presence of poster(s) reminding management of sharps	3	3	3	3	3	3	3	3	3
Presence of a yellow box for sharps	3	3	3	3	3	3	3	3	3
B1 containers (non-contaminated medical waste)	1	2	3	4	5	6	7	8	9
Frequency of use of containers for non-contaminated medical (B1) waste	3	3	1	3	2	2	1	0	0
Presence of container(s) for B1 waste	3	3	0	3	0	0	0	0	0
General	1	2	3	4	5	6	7	8	9
Correct use of waste containers	0	0	3	3	3	3	3	0	3
Type of waste container for PPE disposal	0	0	0	0
Frequency of manure collection if the horse defecates outside the box	0

## Sheet: SI1_EQ_Cl3_Audit_Equipment
EQUIPMENT
Management of equipment for animals
General	Score
Specificity and storage of grooming equipment and foot pick	0
Grooming equipment and foot pick disinfection frequency	0
Clinic-provided material (blanket, etc.) disinfection frequency	0
Frequency of use of the animal's proper equipment	2
Frequency of provision of blanket and halter by the Clinic	2
Specificity of blancket and halter	0
Disinfection method for foot pick, grooming equipment and wrinkle	0	Soaking in a bucket of soapy water with bleach, rinsing then Umonium, then left to drain
Standard disinfectant(s) used for foot pick, grooming equipment	0	Umonium®
Frequency of wrinkle disinfection	0
Standard disinfectant(s) used for wrinkles	0	Umonium®
Examination equipment	Score
Frequency of examination equipment cleaning	0
Cleaning method for examination equipment - compliance with SOPs	0
Frequency of examination equipment disinfection	0				SI
Standard disinfectant(s) used for examination equipment	1	Sterilium (hydro-alcoholic solution)
Specificity of thermometer	0
Frequency of thermometer cleaning	0
Frequency of thermometer disinfection	0
Standard disinfectant(s) used for thermometer	0	Sterilium (hydro-alcoholic solution)
Frequency of stethoscope cleaning	1
Frequency of stethoscope disinfection	1
Disinfectant(s) used for stethoscopes	0	Sterilium (hydro-alcoholic solution)
Disinfection of equipment leaving the unit (cans, etc.)	3	the equipment always remains in the unit (specific laundry)
Disinfectant(s) used for endoscope	0	Umonium®
Special treatment after a parasitic disease	3
Special treatment after a mycotic disease	3
Management of biological samples	Score
Place of storage of biological samples	0
Mode of transport of biological samples	2	Transparent plastic bag that contains the sample (horse name) and analysis request (with animal ID) ; risk not specified
Medicine (drugs)	Score
Drug storage conditions	0

## Sheet: Score per category
	PERSONS
				Median score	Mean score	Maximum score	Standard Deviation
	Clothing and equipment	Students	Cleanliness and wearing of basic PPE	0	0.4	1	0.516398
			Type and cleanliness of footwear	1	0.7	1	0.483046
			Student identification	0	0.2	1	0.421637
			Wearing a long sleeve disposable apron	0	0.3	3	0.948683
			Wearing disposable gloves	0	0.3	3	0.948683
		Staff (clinicians - interns - technicians)	Cleanliness of basic PPE	0	0.8	3
			Cleanliness of footwear	0	0.1	1
			Wearing a long sleeve disposable apron	0	0	0
			Wearing disposable gloves	0	0	0
		Stable staff	Type and cleanliness of working clothes	0	0	0
			Type and cleanliness of footwear	0	0	0
	Preparation procedure for people	Students	Place of preparation	0	0.9	3
			Storage of personal belongings	0	0.9	3
			Long hair tied up	0	0	0
			No wearing of jewelry	0	0	0
			Wearing no accessories	0	0	0
		Staff (clinicians - interns - technicians)	Long hair tied up	0	0	0
			No wearing of jewelry	0	0	0
			Wearing no accessories	0	0	0
		Stable staff	Long hair tied up	0	0	0
			No wearing of jewelry	0	0	0
			Wearing no accessories	0	0	0
	Entry of persons	Students	Frequency of use of the footbath/foot mat at the entrance to the building	0	0.888889	3
			Hand hygiene upon entering class 3	3	2.55556	3
			Wearing a single-use yellow apron	0	1	3
			Wearing disposable gloves	0	1.33333	3
		Staff (clinicians - interns - technicians)	Frequency of use of the footbath/foot mat at the entrance to the building	0	0.0833333	1
			Hand hygiene upon entering class 3	3	2	3
			Wearing a single-use yellow apron	0	0.75	3
			Wearing disposable gloves	0	0.5	3
	Between 2 patients	Students	Frequency of glove changing between patients	0	0.75	3
			Type of use of long sleeve disposable apron	0	0.75	3
			Method of hand hygiene	1	0.875	3
			Frequency of hand hygiene	1	1.375	3
		Staff (clinicians - interns - technicians)	Frequency of glove changing between patients	0	1.125	3
			Type of use of long sleeve disposable apron	0	1.125	3
			Method of hand hygiene	2	1.75	3
			Frequency of hand hygiene	1.5	1.5	3
	Exit of persons	Students	Method of hand hygiene	3	3	3
			Disposal of gloves in yellow containers	3	2.14286	3
			Fate of the long sleeve disposable apron	3	2.14286	3
			Method of hand hygiene upon exiting the unit	1	1.42857	3
		Staff (clinicians - interns - technicians)	Method of hand hygiene	0	0	0
			Disposal of gloves in yellow containers	0	0	0
			Fate of the long sleeve disposable apron	0	1	3
			Method of hand hygiene upon exiting the unit	1	1	3
	GLOBAL SCORE FOR "PERSONS"			0	0.732074
	BEHAVIOR
				Median score	Mean score	Maximum score
	General	Students	Respect of floor color lines	0	0	0
			Food and beverage consumption	0	0	0
			Presence of dogs on site	0	0.5	2
			No smoking	1	1	1
		Staff (clinicians - interns - technicians)	Food and beverage consumption	0	0.666667	2
			Presence of dogs on site	0	0	0
			No smoking	0	0.333333	1
		Stable staff	Food and beverage consumption	1	1	2
			Presence of dogs on site	0	0	0
			No smoking	0	0	0
	Hand hygiene (washing and disinfection)	Presence of poster(s) on hand hygiene		0	0	0
		Students	Hand washing method	2	2	3
			Hand washing after wound care or bandage change	0	1	3
			Hand washing after catheter placement	0	0	0
			Hand washing after eye care	0	0	0
			Hand washing after each patient	1	1	2
			Hand washing upon exiting the clinic	3	3	3
		Staff (clinicians - interns - technicians)	Hand washing method	0	1	3
			Hand washing after wound care or bandage change	0	1	3
			Hand washing after catheter placement	1	1	1
			Hand washing after eye care	1	1	1
			Hand washing after each patient	1	1	1
			Hand washing upon exiting the clinic	1	1	1
		Stable staff	Hand washing method	1	1	1
			Hand washing upon exiting the clinic	0	0	0
			Hand washing after cleaning/disinfection of boxes	2	2	2
	GLOBAL SCORE FOR "BEHAVIOR"			0	0.75
	ANIMALS
				Median score	Mean score	Maximum score
	Animals	Identification on the stall door (class of risk and infectious diagnosis)		1	1.57143	3
		Storage of medicine (treatment cream, ophthalmic ointments)		1	0.6	1
		Cleanliness of animals		0	0	0
		Identification of risk class (Class 3) on the patient		3	3	3
	Consultations	Timing of patient's unloading		0	0	0
		Contacts with hospitalized horses		0	0	0
	Feeding	Type of storage of grains and supplements		0	0	0
		Fodder availability in the unit		3	3	3
		Storage of straw, fodder and cereals		3	3	3
		Importance of pest control (rodents)		2	2	2
	Movements of animals	Frequency of animal exits		0	0.285714	2
		Picking horse's feet before getting out of the box		3	3	3
		Scrubbing horse's feet with 0.5% chlorhexidine 0,5% before getting out of the box		3	3	3
		Overshoes on horsefeet for Imaging Unit		3	3	3
		Cleansing of the horse's path if necessary		3	3	3
		Disinfection of the horse's path if necessary		3	3	3
	GLOBAL SCORE FOR "ANIMALS"			2.5	1.77857
	PREMISES
				Median score	Mean score	Maximum score
	General	Type of identification (ID) on the doors of the box, unit and building		2	2	3
		Visibility of color lines		2	1.8	3
		Cleaning order implemented (if same stable staff for classes 1-2 and class 3)		0	0	0
		Frequency of door knobs disinfection		3	3	3
		For hand hygiene	Availability of antibacterial soap	0	0.8	2
			Availability of paper for hand drying	0	0.4	2
			Availability of disinfectant	0	0	0
			Presence of waste containers for paper used for hand drying	0	0	0
		For footwear cleansing	Presence of a boot-washer	3	3	3
		Foot baths / foot mats	Presence of a foot bath/foot mat	0	1	3
			Aspect of the foot bath/foot mat	0	0.4	2
			Frequency of foot bath emptying/foot mat wetting	0	0	0
			Standard disinfectant(s) used for foot baths/foot mats	0	0	0
		Frequency of door closing	Frequency of unit door closing	0	0.2	1
			Frequency of building door closed	3	3	NA
		Cleaning equipment for Class 3 boxes (wheelbarrow and tools)	Cleaning equipment (wheelbarrow + tools: forks, brushes, etc. )	0	0	NA
	Cleansing and disinfection	Boxes	Frequency of faeces and dirty litter removal	0	0.818182	NA
			Complete emptying of the box after the animal discharge	0	0.9	NA
			Notification of the box to be cleaned and disinfected	0	0.9	NA
			Cleansing method after patient discharge - compliance with standard method	2	1.1	NA
			Disinfection method after patient discharge - compliance with standard method	2	0.9	NA
			Standard disinfectant(s) used for the boxes (usually 2% bleach)	0	0.8	NA
			Disinfectant(s) used after housing a Rhodococcus equi-foal	0	0.8	NA
			Disinfectant used in case of parasitic disease	0	0.9	NA
			Disinfectant(s) used after a rotavirus diarrhoea (usually Umonium Master before bleach)	1	1.2	NA
			Disinfectant contact time	1	1.22222	NA
			Type of PPE worn to perform the cleansing and disinfection process	3	1.44444	NA
		Equipment to clean the boxes - wheelbarrow	Frequency of wheelbarrow cleansing	0	0	NA
			Wheelbarrow cleaning method - compliance with standard method	2	2	NA
			Frequency of wheelbarrow disinfection	0	0	NA
			Disinfection method for wheelbarrows - compliance with standard method	1	1	NA
			Standard disinfectant(s) used for wheelbarrow	0	0	NA
			Disinfectant contact time	1	1	NA
			Type of PPE worn to clean and disinfect wheelbarrows	3	3	NA
		Equipment to clean the tools (forks, brushes, etc.)	Frequency of cleansing the tools used to clean the boxes	3	3	NA
			Cleaning method of equipment used to clean the boxes - compliance with standard method	2	2	NA
			Frequency of disinfection for the equipment used to clean the boxes	0	0	NA
			Disinfection method for cleaning tools - compliance with standard method	2	2	NA
			Standard disinfectant(s) used for tools	3	3	NA
			Disinfectant contact time	1	1	NA
			Type of PPE worn to clean and disinfect the tools used to clean the boxes	3	3	NA
		Floor of consultation rooms	Frequency of consultation room floor cleaning	1	1	NA
			Cleansing method for the floors of consultation rooms - compliance with standard method	1	1	NA
			Frequency of consultation room floor disinfection	1	1	NA
			Disinfection method for the floor of consultation rooms - compliance with standard method	1	1	NA
			Standard disinfectant(s) used for the floor of consultation rooms	0	0	NA
			Disinfectant contact time	1	1	NA
			Type of PPE worn to clean and disinfect the floor of consultation rooms	3	3	NA
		(Indoor) corridors	Corridor cleaning frequency	0	0	NA
			Cleansing method for corridors - compliance with standard method	2	2	NA
			Corridor disinfection frequency	3	3	NA
			Disinfection method for corridors - compliance with standard method	1	1	NA
			Standard disinfectant(s) used for corridors	0	0	NA
			Disinfectant contact time	1	1	NA
			Type of PPE worn to clean and disinfect corridors	3	3	NA
		Covered walkaway	Covered walkaway cleaning frequency	1	1	NA
			Covered walkaway cleaning method - compliance with SOPs	1	1	NA
			Covered walkaway disinfection frequency	3	3	NA
			Covered walkaway disinfection method - compliance with SOPs	3	3	NA
			Standard disinfectant(s) used the for covered walkaway	3	3	NA
			Disinfectant contact time	1	1	NA
			Type of PPE worn to clean and disinfect the covered walkaway	3	3	NA
		B41 courtyard	B41 courtyard cleaning frequency	3	3	NA
			B41 courtyard cleaning method - compliance with standard method	3	3	NA
			Type of PPE worn to clean the B41 courtyard	3	3	NA
		General indoor horizontal surfaces (sinks, tables, etc. other than floors)	Cleaning frequency	0	0	NA
			Cleansing method - compliance with standard method	1	1	NA
			Disinfection frequency	3	3	NA
			Dsinfection method - compliance with standard method	1	1	NA
			Standard disinfectant(s) used surfaces	0	0	NA
			Disinfectant contact time	1	1	NA
			Type of PPE worn to clean and disinfect general surfaces	3	3	NA
	GLOBAL SCORE FOR "PREMISES"			1	1.36923
	WASTE MANAGEMENT
				Median score	Mean score	Maximum score
	B2 containers (for biologically contaminated waste)	Frequency of use of yellow containers for biologically contaminated (B2) waste		0	0	0
		Presence of poster(s) reminding B2 waste management		3	3	3
		Presence of yellow containers for B2 waste		0	0	0
		Cleanliness of the exterior of B2 yellow containers		0	1.33333	3
	B2 containers for sharps	Frequency of use of container for sharps (yellow box)		3	3	3
		Presence of poster(s) reminding management of sharps		3	3	3
		Presence of a yellow box for sharps		3	3	3
	B1 containers (non-contaminated medical waste)	Frequency of use of containers for non-contaminated medical (B1) waste		2	1.66667	3
		Presence of container(s) for B1 waste		0	1	3
	General	Correct use of waste containers		3	2	3
		Type of waste container for PPE disposal		0	0	0
		Frequency of manure collection if the horse defecates outside the box		0	0	0
	GLOBAL SCORE FOR "WASTE MANAGEMENT"			1	1.5
	EQUIPMENT
				Median score	Mean score	Maximum score
	Management of equipment for animals	General	Specificity and storage of grooming equipment and foot pick	0	0	NA
			Grooming equipment and foot pick disinfection frequency	0	0	NA
			Clinic-provided material (blanket, etc.) disinfection frequency	0	0	NA
			Frequency of use of the animal's proper equipment	0	2	NA
			Frequency of provision of blanket and halter by the Clinic	0	2	NA
			Specificity of blancket and halter	0	0	NA
			Disinfection method for foot pick, grooming equipment and wrinkle	0	0	NA
			Standard disinfectant(s) used for foot pick, grooming equipment	0	0	NA
			Frequency of wrinkle disinfection	0	0	NA
			Standard disinfectant(s) used for wrinkles	0	0	NA
		Examination equipment	Frequency of examination equipment cleaning	0	0	NA
			Cleaning method for examination equipment - compliance with SOPs	0	0	NA
			Frequency of examination equipment disinfection	0	0	NA
			Standard disinfectant(s) used for examination equipment	1	1	NA
			Specificity of thermometer	0	0	NA
			Frequency of thermometer cleaning	0	0	NA
			Frequency of thermometer disinfection	0	0	NA
			Standard disinfectant(s) used for thermometer	0	0	NA
			Frequency of stethoscope cleaning	1	1	NA
			Frequency of stethoscope disinfection	1	1	NA
			Disinfectant(s) used for stethoscopes	0	0	NA
			Disinfection of equipment leaving the unit (cans, etc.)	3	3	NA
			Disinfectant(s) used for endoscope	0	0	NA
			Special treatment after a parasitic disease	3	3	NA
			Special treatment after a mycotic disease	3	3	NA
	Management of biological samples	Place of storage of biological samples		0	0	NA
		Mode of transport of biological samples		2	2	NA
	Medicine (drugs)	Drug storage conditions		0	0	NA
	GLOBAL SCORE FOR "EQUIPMENT"			0	0.642857
	GLOBAL SCORES	Median score
	Personsͣ	0
	Behaviorͣ	0
	Animalsͨ	2.5
	Premisesͩ	1
	Waste managementͤ	1
	Equipmentͪ	0
	GLOBAL SCORES	Mean score
	Personsͣ	0.732074
	Behaviorͣ	0.75
	Animalsͨ	1.77857
	Premisesͩ	1.36923
	Waste managementͤ	1.5
	Equipmentͪ	0.642857
